# Supplementary material
Source: ML conference proceedings conference paper supplement (https://proceedings.neurips.cc/paper_files/paper/2023/hash/7a69ab48efcbb0153e72d458fb091969-Abstract.html)
Supplement: Supplementary file 1 [file 7a69ab48efcbb0153e72d458fb091969-Supplemental-Conference.pdf]

# The Emergence of Essential Sparsity in Large Pre-trained Models: The Weights that Matter

Anonymous Author(s)

Affiliation

Address

email

## 1 Supplementary Material

### 1.1 Fine-tuning Details of various Computer Vision and NLP tasks.

Table 1: Downstream tasks fine-tuning details. Learning rate decay linearly from initial value to 0.

| Settings      | Natural Language Processing                        |          |         |        |        |            | Computer Vision                                    |           |               |               |
|---------------|----------------------------------------------------|----------|---------|--------|--------|------------|----------------------------------------------------|-----------|---------------|---------------|
|               | MNLI                                               | QNLI     | QQP     | RTE    | SST-2  | SQuAD v1.1 | CIFAR-10                                           | CIFAR-100 | Fashion-MNIST | Tiny-ImageNet |
| # Training Ex | 392,704                                            | 104,768  | 363,872 | 2,496  | 67,360 | 88,656     | 45,000                                             | 45,000    | 55,000        | 90,000        |
| # Epoch       | 3                                                  | 4        | 3       | 5      | 5      | 3          | 8                                                  | 8         | 8             | 5             |
| Batch Size    | 32                                                 | 32       | 32      | 32     | 32     | 16         | 64                                                 | 64        | 64            | 64            |
| Learning Rate | $2e-5$                                             | $2e-5$   | $2e-5$  | $2e-5$ | $2e-5$ | $3e-5$     | $2e-5$                                             | $2e-5$    | $2e-5$        | $2e-5$        |
| Optimizer     | AdamW with decay ( $\alpha$ ) = $1 \times 10^{-8}$ |          |         |        |        |            | AdamW with decay ( $\alpha$ ) = $2 \times 10^{-8}$ |           |               |               |
| Eval. Metric  | Matched Acc.                                       | Accuracy |         |        |        | F1-score   | Accuracy (Top-1)                                   |           |               |               |

### 1.2 SMC-Bench Arithmetic reasoning Task Settings

Table 2: Hyperparameters and training configurations used for models on Arithmetic Reasoning.

| Datasets               | MAVPS, ASDiv-A, SVAMP           |
|------------------------|---------------------------------|
| Pre-trained Embeddings | bert-base                       |
| Embedding Size         | [768]                           |
| Hidden Size            | [384]                           |
| Number of Layers       | [2]                             |
| Learning Rate          | [8e-4]                          |
| Weight Decay           | [1e-5]                          |
| Embedding LR           | [1e-5]                          |
| Batch Size             | [4 (MAVPS, ASDiv-A), 8 (SVAMP)] |
| Dropout                | [0.5]                           |
| Adam                   | [1e-08]                         |
| Adam $\beta_1$         | [0.9]                           |
| Adam $\beta_2$         | [0.999]                         |
| Training time          | 50 epochs                       |

### 1.3 Pre-trained Computer Vision and NLP Model Details

Table 3: Download links for various Pre-trained NLP and Vision Models.

| Model Name | Download Link                                                                                     |
|------------|---------------------------------------------------------------------------------------------------|
| bert-base  | <a href="https://huggingface.co/bert-base-uncased">https://huggingface.co/bert-base-uncased</a>   |
| bert-large | <a href="https://huggingface.co/bert-large-uncased">https://huggingface.co/bert-large-uncased</a> |
| OPT-125M   | <a href="https://huggingface.co/facebook/opt-125m">https://huggingface.co/facebook/opt-125m</a>   |
| OPT-350M   | <a href="https://huggingface.co/facebook/opt-350m">https://huggingface.co/facebook/opt-350m</a>   |
| OPT-1.3B   | <a href="https://huggingface.co/facebook/opt-1.3b">https://huggingface.co/facebook/opt-1.3b</a>   |
| ViT-base   | <a href="https://huggingface.co/timm">https://huggingface.co/timm</a>                             |
| ViT-large  | <a href="https://huggingface.co/timm">https://huggingface.co/timm</a>                             |
| DINO-base  | <a href="https://github.com/facebookresearch/dino">https://github.com/facebookresearch/dino</a>   |
| DINO-large | <a href="https://github.com/facebookresearch/dino">https://github.com/facebookresearch/dino</a>   |
